# Supplementary material for: A novel electrochemiluminescence aptasensor for protein based on a sensitive N-(aminobutyl)-N-ethylisoluminol-functionalized gold nanoprobe
Source: Royal Society of Chemistry journal article supplement (doi:10.1039/c1an15298j), 2011-01-01
Supplement: c1an15298j.pdf [file c1an15298j.pdf]

Supporting Information (EIS)

**A Novel Electrochemiluminescence Aptasensor for Protein  
Based on a Sensitive  
N-(aminobutyl)-N-ethylisoluminol-functionalized Gold  
Nanoprobe**

*By Ying Chai, Dayong Tian, Jie Gu, Hua Cui\**

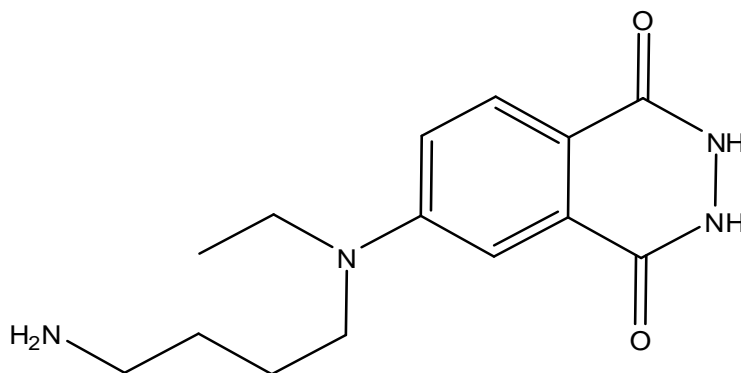

N-(4-Aminobutyl)-N-ethylisoluminol (ABEI)

**Fig. S1** The chemical structure of ABEI.

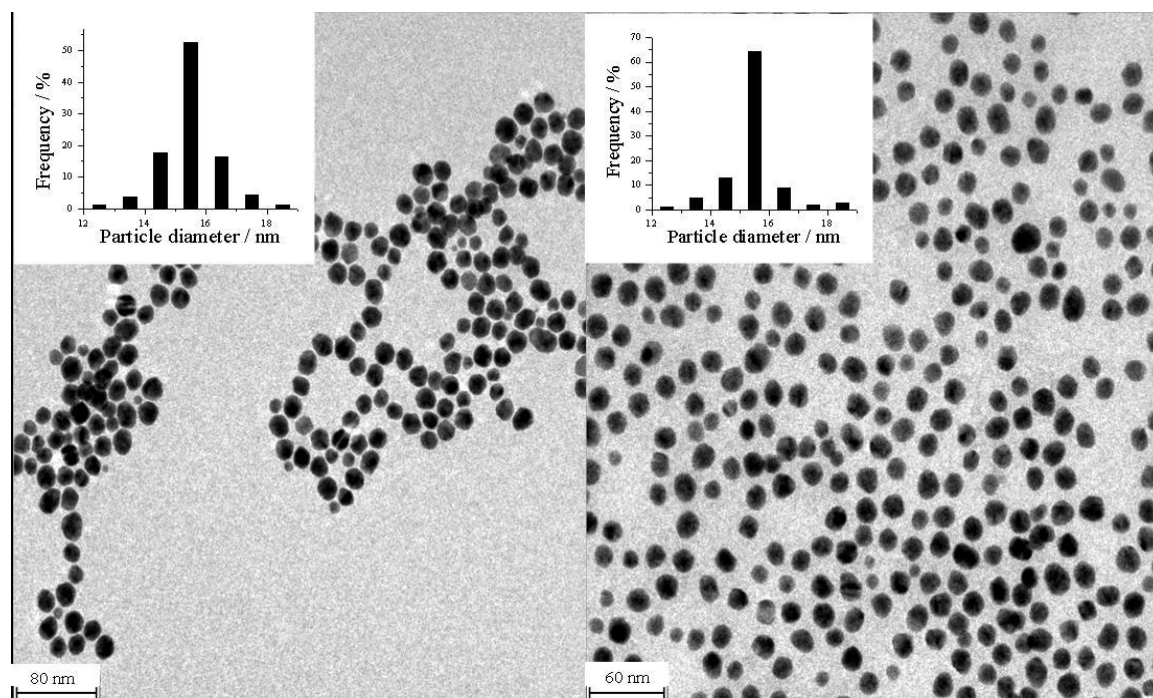

**Fig. S2** TEM photos of ABEI-AuNPs before (a) and after (b) labeled with aptamer signal probe.

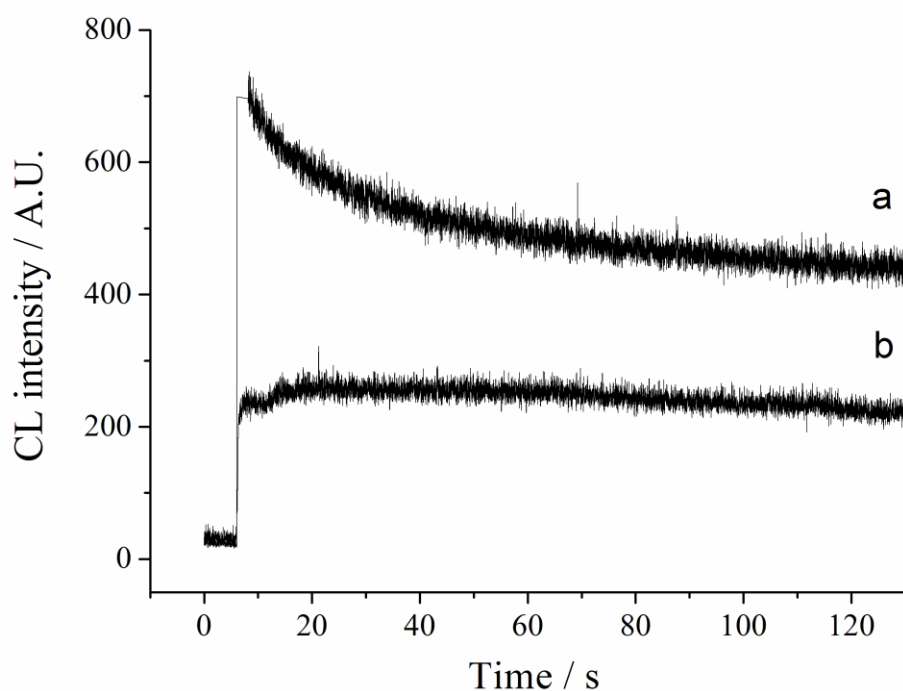

**Fig. S3** The results of static CL injection measurement. a) ABEI-AuNPs; b) ABEI-AuNPs labeled aptamer signal probe. ABEI-AuNPs, in 0.1 M NaOH, 500  $\mu\text{L}$ ;  $\text{H}_2\text{O}_2$ , 0.1 M, 400  $\mu\text{L}$ .

**Preparation of ABEI labeled aptamer signal probe.** The ABEI labeled aptamer signal probes were prepared according to the method of the literature [1] with some modification. 200  $\mu\text{L}$  of a 0.1 M imidazole solution (pH 6.8) was added to the 2 OD (about 66  $\mu\text{g}$  of oligonucleotide) 5'-phosphate PDGF-BB binding aptamer for the activation of the phosphate group for 30 min, then 100  $\mu\text{L}$  of 0.1 M EDAC and 200  $\mu\text{L}$  of  $1.0 \times 10^{-3}$  M ABEI were added. The labeling reaction was incubated at room temperature for 12 h with shaking. Finally the solution was transferred to a 5 mL centrifuge tube, and 100  $\mu\text{L}$  (1/5 volumes) of 3 M sodium acetate and 2.0 mL (4 volumes) of 100% cold ethanol was added. The solution was chilled for 8 h at  $-16\text{ }^\circ\text{C}$

and then centrifuged for 20 min. The precipitate was washed with 200  $\mu$ L of cold 70% ethanol several times to remove any free ABEI. The ABEI labeled aptamer signal probe was dissolved in TE buffer (10 mM pH 8.0 Tris-HCl buffer containing 1 mM EDTA) and stored at -16 °C for further use.

Reference:

1 M.L. Yang, C.Z. Liu, K.J. Qian, P.G. He, Y.Z. Fang, *Analyst*, 2002, **127**, 1267.
